## Mutation bias shapes the spectrum of adaptive substitutions

Alejandro V. Cano<sup>1,2</sup>, Hana Rozhoňová<sup>1,2</sup>, Arlin Stoltzfus<sup>3</sup>, David M. McCandlish<sup>4,\*,@</sup>, and Joshua L. Payne<sup>1,2,\*,@</sup>

<sup>1</sup>Institute of Integrative Biology, ETH, Zurich, Switzerland

<sup>2</sup>Swiss Institute of Bioinformatics, Lausanne, Switzerland

<sup>3</sup>Office of Data and Informatics, Material Measurement Laboratory, NIST, and Institute for Bioscience and Biotechnology Research, Rockville, USA

<sup>4</sup>Simons Center for Quantitative Biology, Cold Spring Harbor Laboratory, Cold Spring Harbor, NY, USA

\*These authors contributed equally

@Corresponding author

### ABSTRACT

Evolutionary adaptation often occurs via the fixation of beneficial point mutations, but different types of mutation may differ in their relative frequencies within the collection of substitutions contributing to adaptation in any given species. Recent studies have established that this spectrum of adaptive substitutions is enriched for classes of mutations that occur at higher rates. Yet, little is known at a quantitative level about the precise extent of this enrichment, or its dependence on other factors such as the beneficial mutation supply or demographic conditions. Here we address the extent to which the mutation spectrum shapes the spectrum of adaptive amino acid substitutions by applying a codon-based negative binomial regression model to three large data sets that include thousands of amino acid changes identified in natural and experimental adaptation in *S. cerevisiae*, *E. coli*, and *M. tuberculosis*. We find that the mutation spectrum has a strong and roughly proportional influence on the spectrum of adaptive substitutions in all three species. In fact, we find that by inferring the mutation rates that best explain the spectrum of adaptive substitutions, we can accurately recover species-specific mutational spectra obtained via mutation accumulation experiments. We complement this empirical analysis with simulations to determine the factors that influence how closely the spectrum of adaptive substitutions mirrors the spectrum of amino acid variants introduced by mutation, and find that the predictive power of mutation depends on multiple factors including population size and the breadth of the mutational target for adaptation.

### SIGNIFICANCE STATEMENT

How do mutational biases influence the process of adaptation? Classical neo-Darwinian thinking assumes that selection alone determines the course of adaptation from abundant pre-existing variation. Yet, theoretical work shows that under some circumstances the mutation rate to a given variant may have a strong impact on the probability of

30 that variant contributing to adaptation. Here we introduce a statistical approach to analyzing how mutation shapes  
31 protein sequence adaptation, and show that the mutation spectrum has a proportional influence on the changes fixed  
32 in adaptation observed in three large data sets. We also show via computer simulations that a variety of factors can  
33 influence how closely the spectrum of adaptive substitutions mirrors the spectrum of variants introduced by mutation.

## 34 KEYWORDS

35 mutation bias; adaptation; proteins; molecular evolution; population genetics

## 36 INTRODUCTION

37 A systematic empirical picture of the spectrum of adaptive substitutions is beginning to emerge from methods  
38 of identifying and verifying individual adaptive changes at the molecular level. The most familiar method is the  
39 retrospective analysis of adaptive species differences, often in cases where multiple substitutions target the same  
40 protein, e.g., changes to photoreceptors involved in spectral tuning [1], changes to ATPase involved in cardiac glycoside  
41 resistance [2], or changes to hemoglobin involved in altitude adaptation [3]. Other retrospective analyses focus on cases  
42 of recent local adaptation, such as the repeated emergence of antibiotic-resistant bacteria [4, 5] or herbicide-resistant  
43 plants [6]. In addition, experimental studies of adaptation in the laboratory provide large and systematic sets of data on  
44 the spectrum of adaptive substitutions [7, 8]. While the first two types of studies tend to focus on specific target genes,  
45 the third approach, combined with genome sequencing, casts a much broader net, covering the entire genome. Such  
46 data were rare just 15 years ago, but they are now sufficiently abundant—cataloging thousands of adaptive events—that  
47 accounting for the species-specific spectrum of adaptive substitutions represents an important challenge.

48 One aspect of this challenge is to understand the role of mutation in shaping the spectrum of adaptive substitutions.  
49 Systematic studies of the distribution of mutational types in diverse organisms [9–17] have demonstrated the presence  
50 of a variety of biases, including transition bias and GC:AT bias, as well as CpG bias and other context effects (for  
51 review, see [18]). At the same time, multiple studies have now shown that adaptive substitutions are enriched for  
52 these mutationally likely changes [5, 19–26]. For instance, the influence of a mutational bias favoring transitions is  
53 evident in the evolution of antibiotic resistance in *Mycobacterium tuberculosis* [5]. Likewise, the evolution of increased  
54 oxygen-affinity in hemoglobins of high-altitude birds shows a tendency to occur at CpG hotspots [24].

55 Such studies have shown effects of specific types of mutation bias using statistical tests for asymmetry, i.e., tests for  
56 a significant excess of a mutationally favored type, relative to a null expectation of parity. A more general question is  
57 how strongly the entire mutation spectrum shapes the spectrum of adaptive substitutions. That is, the entire mutation  
58 spectrum reflects (simultaneously) all relevant mutation biases, and this spectrum shapes the spectrum of adaptive  
59 substitutions to some degree that is, in principle, quantifiable and measurable.

60 Here, we provide an approach to this more general question, based on modeling the spectrum of missense mutations  
61 underlying adaptation as a function of the nucleotide mutation spectrum. More specifically, we use negative binomial

62 regression to model observed numbers of adaptive codon-to-amino acid changes as a function of codon frequencies and  
63 per-nucleotide mutation rates, which we derive from experimental measurements of mutation spectra in the absence  
64 of selection. This modeling framework allows us to measure the influence of mutation bias on adaptive evolution in  
65 terms of the regression coefficient associated with the mutation spectrum.

66 We separately apply this approach to three data sets of missense changes associated with adaptation in *Saccha-*  
67 *romyces cerevisiae*, *Escherichia coli*, and *Mycobacterium tuberculosis*. We find that, in each case, the regression on the  
68 mutation spectrum is significant, with a regression coefficient close to 1 (proportional effect) and significantly different  
69 from zero (no effect). The ability to predict the spectrum of adaptive substitutions differs substantially amongst the  
70 three species, but in each case, we find that experimentally determined mutation spectra provide better model fits  
71 than the vast majority of randomized mutation spectra, confirming the relevance of empirical mutation spectra outside  
72 of the controlled conditions in which they are typically measured. Moreover, we show that by inferring the optimal  
73 mutational spectrum based on the spectrum of adaptive substitutions we can accurately recover species-specific pat-  
74 terns of mutational bias previously documented via mutation accumulation experiments or patterns of neutral diversity.  
75 Finally, we use simulations of a population model to explore the possible reasons for differences in predictability of the  
76 spectrum of adaptive substitutions. As expected, the impact of the mutation spectrum decreases as the total mutation  
77 supply ( $N\mu$ ) increases. However, other factors are important, such as the size and heterogeneity (in adaptive value) of  
78 the set of adaptive mutations.

## 79 RESULTS

### 80 Data and model

81 We curated a list of missense mutations associated with adaptation for each of three species: *S. cerevisiae*, *E. coli*,  
82 and *M. tuberculosis* (Fig. 1a,b; Methods). For *S. cerevisiae*, the mutations were associated with adaptation to one  
83 of several environments during laboratory evolution, including high salinity [27], low glucose [27], rich media [28],  
84 as well as the genetic stress of gene knockout [29]; for *E. coli*, the mutations were associated with adaptation to  
85 temperature stress during laboratory evolution [8]; for *M. tuberculosis*, the mutations were associated with natural  
86 adaptation to one or more of eleven antibiotics or antibiotic classes, and were derived from clinical isolates [5].

87 Because of the possibility that the same substitutions underlie adaptation in multiple independent populations, we  
88 follow [23] in distinguishing between adaptive *paths* defined by a genomic position and a specific mutational change,  
89 and the number of substitutional *events* that have occurred along that path in independent populations. For example,  
90 the mutational path defined by a G→C transversion in the second position of codon 315 of KatG in *M. tuberculosis*,  
91 which changes Ser (AGC) to Thr (ACC), is known to confer resistance to the antibiotic isoniazid [30]. Events along  
92 this mutational path are common in adaptation, occurring 766 independent times in our data set. Below, when we  
93 construct the spectrum of adaptive substitutions, the data are further aggregated by the *type* of path, out of the 354

possible codon-to-amino-acid paths. For instance, all G→C transversions changing Lys (AAG) to Asn (AAC), at all positions in all genes for a given species, are counted together in the AAG to Asn category for that species, and this same category also includes all G→T transversions that change Lys (AAG) to Asn (AAT). Most codon-to-amino-acid paths, however, include only a single type of nucleotide change, e.g., the Ser (AGC) to Thr path only includes G→C transversions from AGC to ACC as in the KatG example above.

Table 1 reports the number of mutational paths and adaptive events for each of our three species. While the *M. tuberculosis* data set is likely composed solely of adaptive changes (since all mutations included have been experimentally verified to confer antibiotic resistance, [5]), for *S. cerevisiae* and *E. coli*, we expect these data sets to be contaminated with a minority of hitchhikers, i.e., mutations that are not drivers of adaptation but which reached a high frequency due to linkage with a driver. Below, we first present our results under the assumption that the mutations in each data set are exclusively adaptive and then use simulations to assess the robustness of our conclusions to various degrees of contamination.

For each species, we use the corresponding list of adaptive events to construct the spectrum of adaptive substitutions (Fig. 1c), which we represent as a 354-element vector  $\mathbf{n}$ , where each element  $\mathbf{n}(c, a)$  corresponds to a single-nucleotide change from codon  $c$  to amino acid  $a$  allowed by the standard genetic code (Methods). For a given species, the value assigned to an element (codon-to-amino acid change) in the spectrum of adaptive substitutions is the observed number of adaptive events associated with that change.

Our goal is to assess the extent to which the spectrum of adaptive substitutions is shaped by the spectrum of genetic changes introduced by mutation (Fig. 1d). To do so, we model the expected number  $\mathbb{E}[\mathbf{n}(c, a)]$  of adaptive mutations from codon  $c$  to amino acid  $a$  as being directly proportional to the genomic frequency  $f(c)$  of codon  $c$ , as well as potentially proportional to the total mutation rate  $\mu(c, a)$  of codon  $c$  to codons for amino acid  $a$ . We obtained codon frequencies from genomic sequences, and we obtained mutation rates from mutation accumulation experiments and single-nucleotide polymorphism data (Methods). In particular, our model can be expressed as

$$\mathbb{E}[\mathbf{n}(c, a)] \propto f(c)\mu(c, a)^\beta \quad (1)$$

where  $\beta$  is an unknown coefficient that describes the dependence of  $\mathbb{E}[\mathbf{n}(c, a)]$  on  $\mu(c, a)$ . Taking the logarithm of this equation gives

$$\log \mathbb{E}[\mathbf{n}(c, a)] = \beta_0 + \log f(c) + \beta \log \mu(c, a) \quad (2)$$

where  $\beta_0$  determines the constant of proportionality. We use negative binomial regression to estimate  $\beta_0$  and  $\beta$ , which is appropriate for counts data that exhibit over-dispersion [31], such as the data studied here.

Importantly, the regression coefficient  $\beta$  in Eqn. 2 measures the influence of mutation bias on adaptation. When

124  $\beta = 0$ ,  $\mathbb{E}[\mathbf{n}(c, a)]$  no longer depends on  $\mu(c, a)$ , implying that mutation bias has no influence on the course of  
125 adaptation. When  $\beta = 1$ ,  $\mathbb{E}[\mathbf{n}(c, a)]$  is directly proportional to  $\mu(c, a)$ , implying a strong influence of mutation bias  
126 on adaptation. For instance,  $\beta = 1$  implies that doubling the rate of a particular mutation type doubles the rate of  
127 adaptive substitutions of that type. Values of  $\beta$  between 0 and 1 indicate an intermediate influence of mutation bias on  
128 adaptation. In what follows, we therefore focus on estimating  $\beta$  for each of our three species of interest.

### 129 **Mutation bias influences adaptation in three distinct species**

130 To what extent does the spectrum of nucleotide changes introduced by mutations influence the genetic basis of  
131 adaptive evolution? The three species examined here differ substantially in their mutational spectra (Fig. S1a).  
132 *M. tuberculosis* shows the greatest heterogeneity in its mutational spectrum with a 14.5-fold difference between  
133 maximum and minimum mutation rates, whereas *S. cerevisiae* and *E. coli* have a somewhat smaller range of rates  
134 (5.6-fold and 4.7-fold ranges, respectively). The species also differ substantially in the rates of individual types of  
135 nucleotide mutations. For instance the rate of G→C transversion is 2.1-fold higher in *S. cerevisiae* than in *E. coli* (Fig.  
136 S1b), whereas the rate of A→T transversions is 2.6-fold higher in *S. cerevisiae* (Fig. S1c) and 3-fold higher in *E. coli*  
137 (Fig. S1d) than in *M. tuberculosis*. Simply comparing these mutational spectra to the spectra of adaptive substitutions  
138 observed in each species reveals a striking congruence between the rate that different types of nucleotide mutations  
139 arise in each species and the frequency that each type of mutation is used in the course of adaptation (Fig. 2a-c).

140 While intriguing, the above analysis does not account for the potentially confounding effects of the genetic code and  
141 codon usage among the three species, where in particular the three species differ substantially in their patterns of codon  
142 usage (Fig. S1e-g). For example GAA (Glu) is the most frequent codon in *S. cerevisiae* (frequency 0.045) and the 2nd  
143 most frequent codon in *E. coli* (frequency 0.039), but it appears much less frequently in *M. tuberculosis* (frequency  
144 0.016). Thus, we might expect adaptive GAA→AAA (Glu→Lys) changes to occur more frequently in *S. cerevisiae*  
145 and *E. coli* than in *M. tuberculosis*, merely by merit of the greater frequency of GAA in the former two species. To  
146 account for this type of influence, as well as for the fact that identical amino acid substitutions can be produced by  
147 different nucleotide mutations because of the standard genetic code, we fit a codon-based negative binomial regression  
148 model to ask to what extent the mutation spectrum influences the spectrum of adaptive substitutions (Eqn. 2). For  
149 each of the three species, this analysis produced an estimate of the regression coefficient  $\beta$  that captures the influence  
150 of the mutational spectrum on the spectrum of adaptive substitutions, as well as an associated  $p$ -value under the null  
151 hypothesis that mutational biases have no influence on the spectrum of adaptive substitutions (i.e.,  $\beta = 0$ ).

152 The results, shown in Table 1, reveal a strong and statistically significant influence of mutation bias on adaptation  
153 in all three species, with each of the 95 % confidence intervals containing  $\beta = 1$ , and excluding  $\beta = 0$ . Specifically, for  
154 *S. cerevisiae*,  $\beta = 1.05$  (95 % CI, 0.89 to 1.21), for *E. coli*  $\beta = 0.98$  (95 % CI, 0.71 to 1.25), and for *M. tuberculosis*,  
155  $\beta = 0.87$  (95 %, 0.42 to 1.32), so that in all three species differences in mutation rates produce approximately

156 proportional changes in the spectrum of adaptive substitutions.

157 Having seen the influence of the mutation spectrum on the spectrum of adaptive substitutions, we can also ask to  
158 what extent the mutational spectrum, pattern of codon usage, and the structure of the genetic code are jointly sufficient  
159 to explain the spectrum of adaptive codon-to-amino acid changes observed in each species. In particular, Figure 2d-f  
160 shows the observed frequency of each type of codon-to-amino acid change in relation to its predicted frequency under  
161 our fitted models. We observe from this figure that despite the mutational spectrum having its maximum theoretically  
162 predicted influence ( $\beta \approx 1$ ), the predictive power of our model nonetheless differs substantially among the three  
163 species, with a correlation between predicted and observed frequencies of 0.68 in *S. cerevisiae* and 0.41 in *E. coli*, but  
164 only 0.16 in *M. tuberculosis*. While all three of these correlations are statistically significant (Table 1), it is clear that  
165 the predictive power of a model depending only on mutation rates and codon frequencies differs between these three  
166 species, an observation that we will return to shortly.

### 167 **Randomization tests support the relevance of empirical mutation spectra for adaptive evolution**

168 The species-specific mutation spectra employed above reflect either (1) mutation-accumulation experiments under  
169 laboratory conditions in the absence of selection (*S. cerevisiae*, *E. coli*), or (2) the frequencies of putatively neutral  
170 single-nucleotide polymorphisms in natural populations (*M. tuberculosis*). We were struck by the observation that,  
171 using these spectra in a prediction model, the 95 % confidence interval on the mutation coefficient contained  $\beta = 1$   
172 for each of the three species. This observation not only suggests a strong influence of mutation bias on adaptation, but  
173 also that previously reported mutation spectra are relevant for adaptive evolution.

174 How well do these species-specific mutation spectra (reported in previously published studies) perform relative to  
175 randomly generated spectra, or to optimized spectra? To address this question, we repeated our analysis  $10^6$  times, each  
176 time using a randomized mutation spectrum followed by the same negative binomial regression according to Eqn. 2.  
177 Each randomized spectrum was generated by drawing a random number between zero and one for each of the six possible  
178 mutation types, using a uniform distribution, and then normalizing the values by their sum to obtain a probability for  
179 each type. We then calculated the difference between the log-likelihood of the model fit with the randomized mutation  
180 spectrum and the log-likelihood of the model fit with the empirical mutation spectrum. When this difference is positive,  
181 the fit using the randomized mutation spectrum explains the spectrum of adaptive substitutions better than the fit using  
182 the empirical mutation spectrum, and when this difference is negative the empirical mutation spectrum provides the  
183 better explanation. Fig. 3a-c shows that the fit using the empirical mutation spectrum almost always explains the  
184 spectrum of adaptive substitutions better than fits using randomized mutation spectra, for all three species. Specifically,  
185 random mutation spectra outperformed empirical spectra with frequency 0.002 for *S. cerevisiae*, 0.037 for *E. coli*, and  
186 0.035 for *M. tuberculosis*. This supports the hypothesis that the genetic changes favored by mutation are also those  
187 more likely to be used during adaptation, and highlights the relevance of empirically characterized mutation spectra

188 for adaptive evolution in the laboratory (*S. cerevisiae*, *E. coli*) and in nature (*M. tuberculosis*).

189 While so far we have attempted to predict the spectrum of adaptive substitutions based on empirically observed  
190 mutation spectra, the strong relationship between the mutational and adaptive spectra in these three species suggests  
191 that it might also be possible to estimate the mutation spectrum from the spectrum of adaptive substitutions. To do  
192 this, we again fitted a negative binomial model but treated the rates of the six possible types of single nucleotide  
193 mutations as free parameters, which we estimated using maximum likelihood. We see that these inferred mutation  
194 spectra bear a strong resemblance to the experimentally characterized mutation spectra (Fig. 3d-f), with a Pearson  
195 correlation coefficient between the rates of 0.945 ( $p = 0.004$ ) for *S. cerevisiae*, 0.960 ( $p = 0.002$ ) for *E. coli*, and 0.827  
196 ( $p = 0.042$ ) for *M. tuberculosis*.

### 197 **What factors determine the predictive power of the model?**

198 Although the analysis above reveals a statistically significant and approximately directly proportional contribution  
199 of mutational biases to the spectrum of adaptive substitutions for all three data sets, there is considerable variation in  
200 the strength of the correlation between the predicted and observed spectra, with this correlation being strongest and  
201 most significant for *S. cerevisiae*, and weakest and least significant for *M. tuberculosis* (Table 1).

202 One immediate hypothesis is that this variation in predictive power is driven by differences in the completeness  
203 of our estimates of the spectrum of adaptive substitutions. Even though our data sets include hundreds to thousands  
204 of adaptive events per species, a substantial fraction of the 354 possible types of codon-to-amino acid substitutions  
205 are missing from the spectrum for each species, a situation that likely arises both due to finite sample size effects and  
206 the limited diversity of distinct adaptive paths under a specific ecological circumstance (e.g., only a limited number  
207 of mutations confer resistance to any given antibiotic). Moreover, we note that at a qualitative level, the smaller the  
208 number of missing codon-to-amino acid paths, the stronger the correlation between predicted and observed spectra of  
209 adaptive substitutions (Table 1).

210 To better evaluate the influence of sparse sampling of codon-to-amino acid paths on the predictive power of our  
211 model, we simulated random data under our codon model with  $\beta = 1$  (Eqn. 2), sampling adaptive events according  
212 to their expected frequencies, based on the empirical codon frequencies and mutation spectrum of each species, but  
213 restricting the sampled adaptive events to those corresponding to the non-zero elements of the observed spectra of  
214 adaptive substitutions. We then used negative binomial regression to fit this simulated spectrum of adaptive substitutions  
215 and measured the correlation between the randomized spectrum of adaptive substitutions and the spectrum of adaptive  
216 substitutions predicted by the fitted model. We repeated this process  $10^3$  times for each species to obtain a distribution  
217 of correlations. Fig. S2 shows these distributions. On average, the correlations decreased from *S. cerevisiae* (0.76) to  
218 *E. coli* (0.75) to *M. tuberculosis* (0.61), suggesting that limitations in our data on the spectrum of adaptive substitutions  
219 are partly responsible for differences in model fits between the three species. However, Fig. S2 also shows that the



220 correlations for these simulated data sets are considerably higher than those obtained with models fit to the observed  
221 spectra of adaptive substitutions (triangles in Fig. S2), suggesting the presence of other factors that modulate the  
222 predictive power of our modeling framework.

223 In order to address a combination of other potentially relevant factors, we turned to population-genetic simulations  
224 of evolution in a haploid genome, with variable parameters for population size  $N$ , mutation rate  $\mu$ , and fraction of  
225 beneficial mutational paths  $B$ . The model genome consists of 500 codons subject to missense mutations, where a  
226 fraction  $B$  of such mutational paths are beneficial with a positive selection coefficient drawn from an exponential  
227 distribution, and all other paths are deleterious with effects drawn from a reflected gamma distribution (Methods).  
228 These simulations were implemented in SLiM v3.4 [32]. For each run of the simulation, we recorded the identity of the  
229 first adaptive mutation to reach fixation, repeating this process 1000 times to produce a simulated data set of adaptive  
230 substitutions of a similar size to our empirical data sets. For each of various combinations of  $N$ ,  $\mu$  and  $B$ , we then  
231 constructed 50 such simulated data sets (Methods) and analyzed these data sets using our negative binomial model.

232 Previous theoretical results suggest that the mutational supply (given by the product  $N\mu$ ) should affect the extent to  
233 which mutational biases influence the distribution of adaptive substitutions [33–36]. In particular, the simplest effect  
234 of increasing  $N\mu$  is that multiple beneficial mutations are typically simultaneously present in the population, so that  
235 the adaptive mutation that ultimately fixes in the population is determined more by selective differences between these  
236 segregating mutations than by which beneficial mutation becomes established in the population first. Fig. 4a confirms  
237 the presence of this effect in our simulations by showing the inferred mutation coefficient  $\beta$  in relation to mutation  
238 supply ( $N\mu$ ) for different proportions of beneficial mutations  $B$ . At the lowest mutation supply,  $\beta$  is approximately  
239 one, reflecting the direct proportionality between mutation rates and evolutionary outcomes that is expected in this  
240 regime [33, 37]. As the mutation supply increases, the average value of  $\beta$  tends toward zero, reflecting a diminished  
241 influence of mutation bias on adaptation. At the same time, the distribution of estimates for  $\beta$  becomes more dispersed  
242 (Fig. 4a) and the individual estimates become both less significant and less certain, as indicated by increasing average  
243  $p$ -values and increasingly large confidence intervals (Fig. S3). Similarly, the predictive power of our model decreases  
244 with increasing mutation supply, as measured by a decreasing average correlation between the predicted and observed  
245 spectra of adaptive events (Fig. 4b).

246 The size of the mutational target also influences the predictive power of the fitted models, but in a somewhat more  
247 surprising manner. Intuitively, one might think that increasing the proportion of beneficial mutations would decrease  
248 the predictive power since this effectively increases the (beneficial) mutational supply, allowing increased competition  
249 between simultaneously segregating beneficial mutations. However, Fig. 4a and b show the opposite pattern, with low  
250 values of  $B$  showing the highest variability in estimated  $\beta$  values (Fig. 4a) and the lowest predictive power (Fig. 4b).  
251 We reason this occurs because larger mutational targets are more likely to contain a range of mutationally favored and  
252 disfavored paths in comparison to smaller mutational targets – thus allowing a correlation to emerge.



253 So far, we have shown that sparse sampling of codon-to-amino acid paths, increasing mutational supply, and a low  
254 proportion of beneficial mutations all tend to decrease the predictive power of our model. One unifying explanation  
255 for these observations rests on the fact that mutational biases have relatively broad effects on the spectrum of adaptive  
256 substitutions, in the sense that increasing a specific single-nucleotide mutation rate will cause a concomitant change in  
257 the relative frequencies of  $\sim 60$  distinct codon-to-amino acid paths. Thus, context-independent mutational biases result  
258 in the enrichment of broad classes of codon-to-amino acid substitutions and will therefore tend to perform poorly in  
259 predicting distributions of adaptive events that are highly concentrated on a small set of paths, whether this is because  
260 of relatively few available adaptive paths in a given selective environment (small  $B$ ), limited sample size (zeros in  
261 observed spectrum), or a distribution of adaptive substitutions concentrated on the few fittest variants (large  $N\mu$ )

262 To quantify both the breadth of the adaptive spectrum and its effects on the predictive power of our model, we  
263 calculated the entropy of the spectrum of adaptive substitutions. We normalized the entropy so that it takes on its  
264 minimum value of 0 when all adaptive events correspond to a single codon-to-amino acid change and its maximum value  
265 of 1 when the adaptive events are uniformly distributed across all possible codon-to-amino acid changes (Methods).  
266 Thus, the entropy quantifies how evenly distributed the adaptive events are among the 354 possible codon-to-amino  
267 acid changes.

268 Fig. 4c shows that the entropy of the spectrum of adaptive substitutions indeed decreases as mutation supply  
269 increases, and that for any level of mutation supply, a lower proportion of beneficial mutations likewise decreases the  
270 entropy. To determine whether these patterns of decreasing entropy are sufficient to explain differences in the predictive  
271 power of our model across the range of model parameters, we plotted the correlation between predicted and observed  
272 events against the entropy of the spectrum of adaptive substitutions (Fig. 4d). We see that increasing entropy, either  
273 via a decreased mutation supply or an increased proportion of beneficial mutations, increases the correlation between  
274 simulated and predicted spectra of adaptive substitutions. These observations from the evolutionary simulations are  
275 qualitatively similar to our empirical observation that as the entropy of the spectrum of adaptive substitutions increases  
276 from *M. tuberculosis* to *E. coli* to *S. cerevisiae*, there is a corresponding increase in the correlation between predicted  
277 and observed spectra of adaptive substitutions (Table 1). Indeed the correlations for our three empirical data sets are  
278 well within the range of what we would expect from our simulations given their respective entropies (Fig. 4d). We  
279 thus conclude that many different factors could potentially influence the predictive power of our model via effects on  
280 the entropy of the spectrum of adaptive substitutions, and that these likely include both population genetic parameters  
281 such as mutation supply, as well as the genetic architecture of the trait being selected, and the number and diversity of  
282 adaptive challenges used to construct the spectrum of adaptive substitutions.

## 283 Assessing possible effects of contamination

284 A key assumption of the analysis above is that the observations used to construct the spectrum of adaptive codon-to-  
285 amino acid changes are indeed adaptive. While this is likely the case for the *M. tuberculosis* data set, we now consider  
286 the possibility that some fraction of observations in the *S. cerevisiae* and *E. coli* data sets represent contamination such  
287 as hitchhikers. If contaminants reflect the mutation spectrum more than genuine adaptive changes, this will exaggerate  
288 the correspondence with mutational predictions.

289 Following [8], we use the observed dN/dS among all substitutions in the adapted lines to estimate the fraction of  
290 events in our data sets that are non-adaptive hitchhikers rather than adaptive drivers (Methods). We find such proportions  
291 to be ~24% and ~13% for *S. cerevisiae* and *E. coli*, respectively. We then assess the influence of contamination by  
292 randomly removing a fraction  $q$  of observations, sampled according to the empirical mutation spectrum: this procedure  
293 simulates the removal of a hypothetical contaminant fraction of size  $q$  under the worst-case scenario that the nucleotide  
294 changes in the contaminant fraction mirror the mutation spectrum. As shown in Fig. S4, even under the assumption  
295 that 40% of the mutations are contaminants, we observe a strong and statistically significant influence of mutation  
296 bias on adaptive evolution. In fact, we estimate that ~65% and ~44% of contamination—for *S. cerevisiae* and *E. coli*,  
297 respectively—would be required to increase the  $p$ -value of  $\beta$  to the point where the influence of mutation bias would  
298 no longer be detectable.

299 We only carried out this procedure for the *S. cerevisiae* and *E. coli* data sets, because they include all missense  
300 changes in the genomes of adapted strains, rather than only driver mutations that are verified experimentally, and are  
301 therefore likely to include a minority of hitchhikers [28, 38]. By contrast, the *M. tuberculosis* data set only includes  
302 mutations that have been shown experimentally to confer antibiotic resistance [5]. This kind of data set represents the  
303 ideal that, perhaps, can be expected to predominate in the future, as it becomes easier to carry out genome editing and  
304 functional assays in a high-throughput manner.

## 305 DISCUSSION

306 A growing body of evidence suggests that specific mutation biases influence the types of genetic changes that cause  
307 adaptation [5, 19–26], consistent with a small body of theoretical work on how biases in the introduction of variation—  
308 both low-level mutational biases and higher-level systemic biases—are expected to influence evolution [33–36]. Here,  
309 we have developed and applied a general approach to assess how the mutation spectrum shapes the spectrum of  
310 adaptive substitutions. Our approach uses negative binomial regression to model the spectrum of adaptive substitutions  
311 as a function of codon frequencies and the mutation spectrum, measuring the influence of mutation in terms of the  
312 regression coefficient  $\beta$ . Such an approach can be applied to any sufficiently large data set of substitutions associated  
313 with adaptation, given codon frequencies and an estimate of the mutation spectrum. Applying our model to three  
314 such species (*Saccharomyces cerevisiae*, *Escherichia coli*, and *Mycobacterium tuberculosis*), we uncovered a clear

315 signal that the mutation spectrum shaped the spectrum of adaptive substitutions. The influence of mutation bias on the  
316 spectrum of adaptive substitutions is proportional in the sense that the inferred value of  $\beta$  is not significantly different  
317 from 1 in any species. This result holds even when we account for contamination by hitchhikers in the data sets for  
318 *S. cerevisiae* and *E. coli*.

319 Our approach also illustrates how the spectrum of adaptive substitutions may be interrogated to reveal clues about  
320 the genetic basis of adaptation. We used our fitted models to predict the spectrum of adaptive substitutions in each  
321 species, and uncovered variation in their predictive capacity, decreasing from *S. cerevisiae* to *E. coli* to *M. tuberculosis*.  
322 Using evolutionary simulations, we uncovered multiple potential sources of this variation. Specifically, we found that  
323 the degree to which the mutation spectrum is a good predictor of the spectrum of adaptive substitutions depends on how  
324 the adaptive events are distributed amongst all possible codon-to-amino acid changes, with distributions concentrated  
325 on a small number of codon-to-amino acid changes associated with reduced predictive capacity. Factors that affect this  
326 distribution include data set size, population genetic conditions, diversity of selective environments, and the genetic  
327 architecture of adaptive traits. Importantly, population genetic conditions that modulate the influence of mutation bias  
328 on adaptation, such as mutation supply, and non-population genetic conditions, such as the diversity of environmental  
329 conditions included in the data set, can affect the predictive capacity of our model in similar ways. Additional work is  
330 needed to disambiguate these various causes of differing model fits between species.

331 For example, the three species studied here vary in their population genetic and environmental conditions, as well  
332 as their mutational target sizes. *M. tuberculosis* has one of the lowest mutation supplies of all bacteria [39], a small  
333 population size upon infection [40], and the 11 antibiotics considered here target specific gene products [5]. For  
334 example, Rifampicin targets the beta subunit of bacterial RNA polymerase, and only a small handful of mutations  
335 to the *rpoB* gene that encodes this subunit cause resistance [41]. Thus, while the population genetic conditions of  
336 *M. tuberculosis* are more likely similar to origin-fixation dynamics than clonal interference dynamics, and the set of  
337 observations is large, the mutational target size for antibiotic resistance is small. In contrast, *E. coli* experiences clonal  
338 interference due to a relatively higher mutation supply [38], but adaptation to temperature stress involves a larger  
339 mutational target [8, 42]. Similarly, *S. cerevisiae* experiences clonal interference due to a high mutation supply [28],  
340 but because the data we study include adaptation to several environmental conditions, the mutational target size is large.  
341 Thus, the inferred influence of mutation bias on adaptation in these three species, increasing from *M. tuberculosis*  
342 to *E. coli* to *S. cerevisiae*, is consistent with our findings from evolutionary simulations that mutation supply and  
343 mutational target size modulate the influence of mutation bias on adaptation.

344 Though this simple model has proven useful, further work may benefit from a broader consideration of sources of  
345 heterogeneity. For instance, a more sophisticated treatment of the mutation spectrum would include effects of local  
346 sequence context [43, 44]. Likewise, the influence of the genetic code could be parameterized separately, as a step  
347 toward understanding the broader evolutionary issue of how genotype-phenotype maps shape the course of evolution.

348 Our analysis of mutational effects includes heterogeneity in fitness effects among beneficial paths (captured  
349 implicitly via the dispersion parameter of the negative binomial model), but does not suppose any systematic relationship  
350 between fitness and codon-to-amino-acid paths. If some beneficial codon-to-amino acid changes have systematically  
351 higher selection coefficients than others, which one might expect from generic differences in amino acid exchangeability  
352 [45], this may influence how strongly the mutation spectrum shapes the spectrum of adaptive substitutions. If the  
353 nucleotide changes favored by mutation are not the same as those favored by selection, this could diminish the influence  
354 of mutation bias on adaptation [35]. This kind of effect might be particularly strong due to the dominance of a small  
355 number of idiosyncratic paths. That is, if fitness effects are highly heterogeneous, such that a small number of mutations  
356 have exceedingly high selection coefficients, and these nucleotide changes are not those favored by mutation, this could  
357 diminish the predictive capacity of our model. The data set for *M. tuberculosis* contains such “jackpot” mutations [5],  
358 e.g., the G→C transversion that causes the S315T substitution in KatG and confers resistance to isoniazid [30]. Because  
359 the mutation spectrum of *M. tuberculosis* is biased toward transitions [12], this jackpot mutation likely reduces the  
360 predictive capacity of our fitted model.

361 The discovery that the mutation spectrum strongly shapes the spectrum of adaptive substitutions has several  
362 implications. First, this finding has implications for the predictability of evolution [46–48], because it shows that the  
363 nucleotide changes that are more likely to arise via mutation are also those more likely to contribute to evolutionary  
364 adaptation, an effect that is both large and readily predictable from data on the mutation spectrum. Long-term  
365 laboratory evolution experiments often uncover molecular diversity in adaptive convergence, meaning that in replicate  
366 populations, distinct sets of mutations cause adaptation to identical environments [8]. We uncover an additional layer  
367 of convergence: though distinct sets of mutations cause adaptation in different replicate populations, the influence of  
368 mutation bias causes these sets to converge on similar patterns of nucleotide changes and codon-to-amino-acid changes.

369 Secondly, the discovery of a direct influence of mutation bias on evolutionary adaptation parallels recent reports  
370 that driver mutations in cancer reflect the underlying biases of cancer-associated mutational processes, including  
371 exogenous effects of UV light and tobacco exposure, and endogenous effects of DNA mismatch repair and APOBEC  
372 activity [49–51]. The increased predictability of such changes, due to mutational effects, can inform rational drug  
373 design, as has been suggested for drugs for leukemia, prostate cancer, breast cancer, and gastrointestinal stromal  
374 tumors [26]. The same may be true for designing antibiotic treatments for mycobacteria, which evolve multi-drug  
375 resistance via a sequence of mutations, several of which interact epistatically, such that only a subset of possible  
376 mutational trajectories to multi-drug resistance are possible [52]. If some of these paths comprise nucleotide changes  
377 that are less likely to arise via mutation, then this could inform treatment regimens.

378 Finally, the broadest context for the present work is a debate about the relative roles of mutation and selection  
379 in shaping the course of evolution. Arguments dating back to the Modern Synthesis emphasize selection as the  
380 sole directional force, with mutation treated as a weak and ineffectual pressure due to the smallness of mutation

381 rates [53–55], e.g., Haldane concluded that mutation can influence the course of evolution only under neutral evolution,  
382 or when mutation rates are unusually high [53]. More recent theory shows how such conclusions depend on assuming  
383 that evolution begins with abundant standing genetic variation, so that mutation acts only as a frequency-shifting force  
384 and not as the source of genetic novelty [33]. When evolution depends on mutation as a source of novelty, biases in the  
385 introduction of variants, such as toward particular nucleotide changes, systematically influence which genetic changes  
386 are involved in adaptation [34, 56].

387 Some authors have responded to the theory of mutation-biased adaptation by arguing that such an influence is  
388 unlikely, on the grounds of requiring sign epistasis or unusually small population sizes [57]. However, modeling here  
389 and in other work [35, 36] shows that mutation bias can influence adaptation across a range of conditions, including  
390 conditions that induce clonal interference among concurrent mutations. More broadly, while theoretical arguments are  
391 surely helpful for sharpening our understanding, ultimately the prevalence and magnitude of the mutational influence  
392 on adaptation is an empirical question, and the impact of mutational biases has now been shown for several different  
393 types of mutations, in a range of systems from bacteriophage to birds to somatic evolution in human cancers [5, 19–26].

394 This growing body of work, in turn, provides a population-genetic mechanism for previously proposed theories  
395 concerning how variational properties influence the evolutionary process. For instance, evo-devo arguments about bias  
396 or constraint relate evolutionary patterns to tendencies of developmental variation, but the causal nature of this link, in  
397 terms of population-genetic principles, is typically unspecified (e.g., [58, 59]). Though some sources invoke constraints  
398 in the context of quantitative genetics [60], the latter framework only applies to dimensional biases in quantitative traits,  
399 whereas the theory of biases in the introduction process is suitable for molecular and other discrete traits, e.g., this  
400 theory plausibly applies to a small body of work on the tendency of evolution to prefer more findable structures in  
401 cases such as RNA folds [61] or regulatory circuits [62]. Our results improve the population-genetic underpinnings of  
402 these theories by showing that mutational biases, which are a similar but even simpler set of biases, have a clear and  
403 measurable impact on the distribution of variants fixed during adaptive evolution.

## 404 **METHODS**

### 405 **Data**

406 Our modeling framework is built around three key quantities, which are specific to each species: A spectrum of  
407 adaptive substitutions  $\mathbf{n}$ , a table of codon frequencies  $f$ , and a mutation spectrum  $\mu$ . These are all constructed using  
408 empirical data, as described below.

#### 409 *Spectrum of adaptive substitutions*

410 We curated a list of missense mutations associated with adaptation from the published literature for each of three  
411 species: *S. cerevisiae*, *E. coli*, and *M. tuberculosis*. For each mutation, these lists specify a genomic coordinate,  
412 nucleotide change, amino acid substitution, and literature reference (Tables S2-S4). We refer to each unique combination

413 of genomic coordinate and nucleotide change as a mutational path and each instance of adaptive change along a  
414 mutational path as an adaptive event. The number of adaptive events per mutational path are also reported in Tables  
415 S2-S4.

416 For *S. cerevisiae*, the adaptive events were reported in four studies, each of which considered one or more  
417 environmental or genetic challenges, including high salinity [27], low glucose [27], rich media [28], and gene knockout  
418 [29]. The list contains 721 adaptive events across 534 mutational paths (Table S2).

419 For *E. coli*, the adaptive events were reported in a single study of 115 replicate populations adapting to temperature  
420 stress [8]. The list contains 602 adaptive events across 492 mutational paths (Table S3).

421 For *M. tuberculosis*, the adaptive events were reported in a single study of the influence of mutation bias on  
422 adaptation to antibiotic stress [5]. The underlying mutational paths were derived from two separate meta-analysis  
423 of the literature on antibiotic resistance (one performed for the study and another previously published [4]), with  
424 each mutational path required to pass stringent tests for conferring antibiotic resistance. A total of 11 antibiotics  
425 or antibiotic classes were considered: Rifampicin, ethambutol, isoniazid, ethionamide, ofloxacin, pyrazinamide,  
426 streptomycin, kanamycin, pyrazinamide, fluoroquinolones, and aminoglycosides. The adaptive events were inferred  
427 from a phylogenetic reconstruction of public *M. tuberculosis* genomes. We merged the adaptive events from the two  
428 meta-analyses. The resulting list contains 4413 adaptive events across 283 mutational paths (Table S4). Analyzing  
429 the adaptive events from the two meta-analyses separately (Table S1) produced qualitatively similar results to those  
430 reported in Table 1.

431 For each species, we constructed the spectrum of adaptive substitutions  $\mathbf{n}$  from the list of adaptive events described  
432 above, assigning each adaptive event to its respective codon-to-amino-acid change. Each element  $\mathbf{n}(c, a)$  of the  
433 spectrum of adaptive substitutions therefore tallies the number of adaptive events that changed codon  $c$  to amino acid  
434  $a$ . Note the adaptive events tallied for any codon-to-amino-acid change often reflect more than one genomic coordinate  
435 and/or nucleotide change (i.e., different mutation paths). These spectra are reported in Table S5.

#### 436 *Codon frequencies*

437 We used the tables of codon frequencies reported in the Codon Usage Database [63], found via query to an exact  
438 match to *Saccharomyces cerevisiae*, *Escherichia coli*, and *Mycobacterium tuberculosis*. These frequencies are reported  
439 in Table S6 and shown in Fig. S1e-g.

#### 440 *Empirical mutation spectra*

441 For *S. cerevisiae* and *E. coli*, we used mutation rates derived from mutation accumulation experiments, as reported  
442 in Figure 3 of reference [15] and Table 3 of reference [14], respectively. For *M. tuberculosis*, we used mutation rates  
443 derived from single-nucleotide polymorphism data, extracted from Figure 2A in reference [12] using a web-based  
444 image analysis tool [64]. For *E. coli*, we corrected the mutation rates for GC content, following [12]. For *S. cerevisiae*

445 and *M. tuberculosis*, the rates were already corrected [12, 15].

446 These spectra are reported in Table S7 and shown in Fig. S1a. We used these estimated mutation rates to define  
447 a total codon-to-amino acid mutation rate  $\mu(c, a)$  for each of the 354 codon-to-amino acid changes allowed by the  
448 standard genetic code, summing the rates of all point mutations in codon  $c$  that lead to amino acid  $a$ . For example,  
449 the probability of the substitution from codon CAC to Glutamine (Q) is the sum of the probabilities of point mutations  
450 C→A and C→G, since both mutations in the third position of CAC lead to codons for Glutamine (Q).

### 451 **Entropy of the spectrum of adaptive substitutions**

452 The spectrum of adaptive substitutions  $\mathbf{n}$  describes the number of adaptive events per codon-to-amino acid change.  
453 We calculate the entropy  $H$  of this spectrum as

$$454 H = \frac{-\sum_{i=1}^m p(n_i) \log p(n_i)}{\log(m)} \quad (3)$$

455 where  $p(n_i)$  is the proportion of adaptive events that correspond to the  $i$ th codon-amino acid change, and  $m = 354$  is  
456 the number of codon-to-amino acid changes allowed by the standard genetic code.

### 457 **Evolutionary simulations**

458 We used SLiM v3.4 for the evolutionary simulations [32]. We ran each simulation until a single mutation went  
459 to fixation, which we recorded as an adaptive event. We recorded 1000 such events per replicate by running 1000  
460 independent simulations. We performed 50 replicates per combination of the parameters  $N$ ,  $\mu$ , and  $B$ .

461 Each of the 1000 simulations per replicate used the same initial population, which comprised  $N$  copies of a  
462 nucleotide sequence of length  $L = 1500$  (i.e., 500 codons), randomly generated using the codon frequencies for  
463 *S. cerevisiae*. All sequences in the initial population were assigned a fitness of one. The fitness effects assigned to each  
464 of the possible codon-to-amino acid changes from each of the 500 codons were drawn at random from a distribution  
465 of fitness effects, and were held constant across the 1000 simulations per replicate.

466 A unique distribution of fitness effects was constructed for each replicate, such that synonymous mutations were  
467 neutral, a fraction  $B$  of non-synonymous codon-to-amino acid changes were beneficial, and a fraction  $1 - B$  of non-  
468 synonymous codon-to-amino acid changes were deleterious. The fitness effects of beneficial codon-to-amino acid  
469 changes were drawn from an exponential distribution with density

$$470 f_b(x) = \lambda e^{-\lambda x} \quad (4)$$

471 where  $\lambda = 33.33$ , so that the expected advantageous selection coefficient was 0.03. The fitness effects of deleterious  
472 codon-to-amino acid changes were drawn from a gamma distribution with density



$$f_d(x) = \frac{x^{(a-1)} e^{-(x/s)}}{s^a \Gamma(a)} \quad (5)$$

where  $a = 0.2$  and  $s = 6.6$ . Fig. S5 shows representative distributions of fitness effects for different proportions of beneficial mutations  $B$ .

Each simulation proceeded until a single mutation went to fixation. In each generation  $t$ ,  $N$  sequences were chosen from the population at generation  $t - 1$  with replacement and with a probability proportional to their fitness. Mutations were introduced according to the product of the genome-wide mutation rate  $\mu$  and the per-nucleotide mutation rate defined by the mutation spectrum for *S. cerevisiae*, with each mutation affecting fitness as defined at the onset of the simulation.

### Contamination estimates

For each type of mutation, we calculated the number of synonymous and non-synonymous sites for each possible codon, and we estimated the total number of synonymous and non-synonymous sites in the genome by taking into account the codon usage patterns of *S. cerevisiae* and *E. coli* (Fig. S1e-f). We then calculated dN/dS ratios among all substitutions in the adapted lines correcting for the mutation rates of each type of mutation (Fig. S1a). Following [8], we estimated the proportion of adaptive non-synonymous mutations from such ratios as  $y = (x - 1.0)/x$ , where  $x$  is the estimated dN/dS ratio (4.24 and 7.76 for *S. cerevisiae* and *E. coli*, respectively). Finally, we estimated the fraction of hitch-hikers in our data sets as  $1 - y$ .

### ACKNOWLEDGMENTS

The identification of any specific commercial products is for the purpose of specifying a protocol, and does not imply a recommendation or endorsement by the National Institute of Standards and Technology. This project / publication was made possible through the support of a grant from the John Templeton Foundation (grant #61782, D.M.M.) and from the Swiss National Science Foundation (grant #PP00P3\_170604, J.L.P.). The opinions expressed in this publication are those of the authors and do not necessarily reflect the views of the John Templeton Foundation. D.M.M. also acknowledges additional support from an Alfred P. Sloan Research Fellowship and from the Simons Center for Quantitative Biology.

### REFERENCES

- [1]S. Yokoyama and F. B. Radlwimmer. The molecular genetics and evolution of red and green color vision in vertebrates. *Genetics*, 158(4):1697–710, 2001.
- [2]B. Ujvari, N. R. Casewell, K. Sunagar, et al. Widespread convergence in toxin resistance by predictable molecular evolution. *Proc Natl Acad Sci U S A*, 112(38):11911–6, 2015.

- 502 [3]C. Natarajan, J. Projecto-Garcia, H. Moriyama, et al. Convergent evolution of hemoglobin function in high-altitude  
503 Andean waterfowl involves limited parallelism at the molecular sequence level. *PLoS Genet*, 11(12):e1005681, 2015.
- 504 [4]Abigail Manson, Keira Cohen, Thomas Abeel, et al. Genomic analysis of globally diverse *Mycobacterium tubercu-*  
505 *losis* strains provides insights into the emergence and spread of multidrug resistance. *Nature Genetics*, 49:395–402,  
506 2017.
- 507 [5]Joshua L. Payne, Fabrizio Menardo, Andrej Trauner, et al. Transition bias influences the evolution of antibiotic  
508 resistance in *Mycobacterium tuberculosis*. *PLoS Biology*, 17(5), 2019.
- 509 [6]W. Liu, D. K. Harrison, D. Chalupska, et al. Single-site mutations in the carboxyltransferase domain of plastid acetyl-  
510 coa carboxylase confer resistance to grass-specific herbicides. *Proceedings of the National Academy of Sciences of*  
511 *the United States of America*, 104(9):3627–32, 2007.
- 512 [7]J. R. Meyer, D. T. Dobias, J. S. Weitz, et al. Repeatability and contingency in the evolution of a key innovation in  
513 phage lambda. *Science*, 335(6067):428–32, 2012.
- 514 [8]Olivier Tenaillon, Alejandra Rodríguez-Verdugo, Rebecca L. Gaut, et al. The molecular diversity of adaptive  
515 convergence. *Science*, 2012.
- 516 [9]Roel M. Schaaper and Ronnie L. Dunn. Spectra of spontaneous mutations in *Escherichia coli* strains defective  
517 in mismatch correction: The nature of *in vivo* DNA replication errors. *Proceedings of the National Academy of*  
518 *Sciences*, 84:6220–6224, 1987.
- 519 [10]Zhaolei Zhang and Mark Gerstein. Patterns of nucleotide substitution, insertion and deletion in the human genome  
520 inferred from pseudogenes. *Nucleic Acids Research*, 31:5338–48, 2003.
- 521 [11]Peter Keightley, Urmi Trivedi, Marian Thomson, et al. Analysis of the genome sequences of 3 *Drosophila*  
522 *melanogaster* spontaneous mutation accumulation lines. *Genome research*, 19:1195–201, 2009.
- 523 [12]Ruth Hershberg and Dmitri A. Petrov. Evidence that mutation is universally biased towards AT in bacteria. *PLoS*  
524 *Genetics*, 2010.
- 525 [13]S. Ossowski, Korbinian Schneeberger, José Lucas-Lledó, et al. The rate and molecular spectrum of spontaneous  
526 mutations in *Arabidopsis thaliana*. *Science*, 327:92–4, 2010.
- 527 [14]Heewook Lee, Ellen Popodi, Haixu Tang, and Patricia L. Foster. Rate and molecular spectrum of spontaneous  
528 mutations in the bacterium *Escherichia coli* as determined by whole-genome sequencing. *Proceedings of the National*  
529 *Academy of Sciences of the United States of America*, 2012.
- 530 [15]Yuan O. Zhu, Mark L. Siegal, David W. Hall, and Dmitri A. Petrov. Precise estimates of mutation rate and spectrum  
531 in yeast. *Proceedings of the National Academy of Sciences*, 2014.
- 532 [16]Sibel Kucukyildirim, Hongan Long, Way Sung, et al. The rate and spectrum of spontaneous mutations in *Mycobac-*  
533 *terium smegmatis*, a bacterium naturally devoid of the post-replicative mismatch repair pathway. *G3*, 6:2157–2163,  
534 2016.

- 535 [17]Matthew D. Pauly, Megan C. Procario, and Adam S. Lauring. A novel twelve class fluctuation test reveals higher  
536 than expected mutation rates for influenza A viruses. *eLife*, 6:e26437, 2017.
- 537 [18]V. Katju and U. Bergthorsson. Old trade, new tricks: Insights into the spontaneous mutation process from the  
538 partnering of classical mutation accumulation experiments with high-throughput genomic approaches. *Genome Biol*  
539 *Evol*, 11(1):136–165, 2019.
- 540 [19]Darin Rokytka, Paul Joyce, Stanley Caudle, and Holly Wichman. An empirical test of the mutational landscape  
541 model of adaptation using a single-stranded DNA virus. *Nature Genetics*, 37:441–444, 2005.
- 542 [20]Craig Maclean, Gabriel Perron, and Andy Gardner. Diminishing returns from beneficial mutations and pervasive  
543 epistasis shape the fitness landscape for Rifampicin resistance in *Pseudomonas aeruginosa*. *Genetics*, 186:1345–54,  
544 2010.
- 545 [21]Alejandro Couce, Alexandro Rodríguez-Rojas, and Jesus Blazquez. Bypass of genetic constraints during mutator  
546 evolution to antibiotic resistance. *Proceedings of the Royal Society London B*, 282:20142698, 2015.
- 547 [22]Andrew M Sackman, Lindsey W McGee, Anneliese J Morrison, et al. Mutation-driven parallel evolution during  
548 viral adaptation. *Molecular Biology and Evolution*, 34(12):3243–3253, 2017.
- 549 [23]Arlin Stoltzfus and David M McCandlish. Mutational biases influence parallel adaptation. *Molecular Biology and*  
550 *Evolution*, 34(9):2163–2172, 2017.
- 551 [24]Jay F. Storz, Chandrasekhar Natarajan, Anthony V. Signore, et al. The role of mutation bias in adaptive molecular  
552 evolution: insights from convergent changes in protein function. *Philosophical Transactions of the Royal Society B:*  
553 *Biological Sciences*, 374(1777):20180238, 2019.
- 554 [25]Frederic Bertels, Christine Leemann, Karin J Metzner, and Roland R Regoes. Parallel evolution of HIV-1 in a  
555 long-term experiment. *Molecular Biology and Evolution*, 36(11):2400–2414, 2019.
- 556 [26]Scott Leighow, Chuan Liu, Haider Inam, Boyang Zhao, and Justin Pritchard. Multi-scale predictions of drug  
557 resistance epidemiology identify design principles for rational drug design. *Cell Reports*, 30:3951–3963, 2020.
- 558 [27]Linda M. Kohn and James B. Anderson. The underlying structure of adaptation under strong selection in 12  
559 experimental yeast populations. *Eukaryotic Cell*, 13(9):1200–1206, 2014.
- 560 [28]Gregory I. Lang, Daniel P. Rice, Mark J. Hickman, et al. Pervasive genetic hitchhiking and clonal interference in  
561 forty evolving yeast populations. *Nature*, 500(7464):571–574, 2013.
- 562 [29]Béla Szamecz, Gábor Boross, Dorottya Kalapis, et al. The genomic landscape of compensatory evolution. *PLoS*  
563 *Biology*, 12(8), 2014.
- 564 [30]Shengwei Yu, Stefania Giroto, ChiuHong Lee, and Richard Magliozzo. Reduced affinity for Isoniazid in the S315T  
565 mutant of *Mycobacterium tuberculosis* KatG is a key factor in antibiotic resistance. *The Journal of Biological*  
566 *Chemistry*, 278:14769–14775, 2003.
- 567 [31]P. McCullagh and J.A. Nelder. *Generalized Linear Models, Second Edition*. Chapman & Hall/CRC Monographs

- 568 on Statistics & Applied Probability. Taylor & Francis, 1989.
- 569 [32]Philipp W. Messer. SLiM: Simulating evolution with selection and linkage. *Genetics*, 2013.
- 570 [33]Lev Y. Yampolsky and Arlin Stoltzfus. Bias in the introduction of variation as an orienting factor in evolution.  
571 *Evolution & Development*, 3(2):73–83, 2001.
- 572 [34]Arlin Stoltzfus. Mutation-biased adaptation in a protein NK model. *Molecular Biology & Evolution*, 23:1852–1862,  
573 2006.
- 574 [35]Alejandro V. Cano and Joshua L. Payne. Mutation bias interacts with composition bias to influence adaptive  
575 evolution. *PLOS Computational Biology*, 16:1–26, 09 2020.
- 576 [36]Kevin Gomez, Jason Bertram, and Joanna Masel. Mutation bias can shape adaptation in large asexual populations  
577 experiencing clonal interference. *Proceedings of the Royal Society B: Biological Sciences*, 287(1937):20201503,  
578 2020.
- 579 [37]D.M. McCandlish and A. Stoltzfus. Modeling evolution using the probability of fixation: history and implications.  
580 *Quarterly Review of Biology*, 89(3):225–252, 2014.
- 581 [38]Benjamin Good, Michael McDonald, Jeffrey Barrick, Richard Lenski, and Michael Desai. The dynamics of  
582 molecular evolution over 60,000 generations. *Nature*, 551:45–50, 2017.
- 583 [39]Vegard Eldholm and Francois Balloux. Antimicrobial resistance in *Mycobacterium tuberculosis*: The odd one out.  
584 *Trends in Microbiology*, 24:637–648, 04 2016.
- 585 [40]Sebastien Gagneux. Ecology and evolution of *Mycobacterium tuberculosis*. *Nature Reviews Microbiology*,  
586 16(4):202–213, 2018.
- 587 [41]Christopher Ford, Rupal Shah, Midori Maeda, et al. *Mycobacterium tuberculosis* mutation rate estimates from  
588 different lineages predict substantial differences in the emergence of drug-resistant tuberculosis. *Nature Genetics*,  
589 45:784–790, 06 2013.
- 590 [42]Daniel Deatherage, Jamie Kepner, Albert Bennett, Richard Lenski, and Jeffrey Barrick. Specificity of genome  
591 evolution in experimental populations of *Escherichia coli* evolved at different temperatures. *Proceedings of the  
592 National Academy of Sciences*, 114:201616132, 2017.
- 593 [43]Way Sung, Matthew Ackerman, Jean-François Gout, et al. Asymmetric context-dependent mutation patterns  
594 revealed through mutation-accumulation experiments. *Molecular Biology and Evolution*, 32:1672–1683, 2015.
- 595 [44]Rachael Aikens, Kelsey Johnson, and Benjamin Voight. Signals of variation in human mutation rate at multiple  
596 levels of sequence context. *Molecular Biology and Evolution*, 36:955–965, 2019.
- 597 [45]L. Y. Yampolsky and A. Stoltzfus. The exchangeability of amino acids in proteins. *Genetics*, 170(4):1459–1472,  
598 2005.
- 599 [46]J. Franke, A. Klozer, J. A. de Visser, and J. Krug. Evolutionary accessibility of mutational pathways. *PLoS  
600 computational biology*, 7(8):e1002134, 2011.

- 601 [47]D. L. Stern and V. Orgogozo. Is genetic evolution predictable? *Science*, 323(5915):746–51, 2009.
- 602 [48]M. Lässig, V. Mustonen, and A. M. Walczak. Predicting evolution. *Nat Ecol Evol*, 1(3):77, 2017.
- 603 [49]D. Temko, I.P.M. Tomlinson, S. Severini, B. Schuster-Bockler, and T.A. Graham. The effects of mutational  
604 processes and selection on driver mutations across cancer types. *Nature Communications*, 9:1857, 2018.
- 605 [50]R.C. Poulos, Y.T. Wong, R.Ryan, H. Pang, and J.W.H. Wong. Analysis of 7,815 cancer exomes reveals associations  
606 between mutational processes and somatic driver mutations. *PLoS Genetics*, 14:e1007779, 2018.
- 607 [51]J.D. Mandell Cannataro, V.L. and J.P. Townsend. Attribution of cancer origins to endogenous, exogenous, and  
608 actionable mutational processes. *bioRxiv*, page 10.1101/2020.10.24.352989, 2020.
- 609 [52]S. Borrell, Y. Teo, F. Giardina, et al. Epistasis between antibiotic resistance mutations drives the evolution of  
610 extensively drug-resistant tuberculosis. *Evolution, Medicine, and Public Health*, 14:65–74, 2013.
- 611 [53]J.B.S. Haldane. A mathematical theory of natural and artificial selection. v. selection and mutation. *Proc. Cam.*  
612 *Phil. Soc.*, 26:220–230, 1927.
- 613 [54]J.B.S. Haldane. The part played by recurrent mutation in evolution. *Am. Nat.*, 67(708):5–19, 1933.
- 614 [55]R.A. Fisher. *The Genetical Theory of Natural Selection*. Oxford University Press, London, 1930.
- 615 [56]Arlin Stoltzfus. Mutationism and the dual causation of evolutionary change. *Evolution & Development*, 8:304–317,  
616 2006.
- 617 [57]E. I. Svensson and D. Berger. The role of mutation bias in adaptive evolution. *Trends Ecol Evol*, 34(5):422–434,  
618 2019.
- 619 [58]J. Maynard Smith, R. Burian, S. Kauffman, et al. Developmental constraints and evolution. *Quart. Rev. Biol.*,  
620 60(3):265–287, 1985.
- 621 [59]Sara Green and Nicholaos Jones. Constraint-based reasoning for search and explanation: Strategies for understand-  
622 ing variation and patterns in biology. *Dialectica*, 70(3):343–374, 2016.
- 623 [60]G. H. Bolstad, T. F. Hansen, C. Pelabon, et al. Genetic constraints predict evolutionary divergence in dalechampia  
624 blossoms. *Philos Trans R Soc Lond B Biol Sci*, 369(1649):20130255, 2014.
- 625 [61]Kamaludin Dingle, Fatme Ghaddar, Petr Šulc, and Ard A. Louis. Phenotype bias determines how RNA structures  
626 occupy the morphospace of all possible shapes. *bioRxiv*, page 2020.12.03.410605, 2020.
- 627 [62]Kun Xiong, Mark Gerstein, and Joanna Masel. Non-adaptive factors determine which equally effective regulatory  
628 motif evolves to generate pulses. *bioRxiv*, page 2020.12.02.409151, 2020.
- 629 [63]Yasukazu Nakamura, Takashi Gojobori, and Toshimichi Ikemura. Codon usage tabulated from international DNA  
630 sequence databases: status for the year 2000. *Nucleic acids research*, 28(1):292–292, 2000.
- 631 [64]Ankit Rohatgi. Webplotdigitizer: Version 4.3, 2020.

| Species                | Data  |        | Neg. binomial regression |              | Prediction model |                   | Spectrum elements |         |
|------------------------|-------|--------|--------------------------|--------------|------------------|-------------------|-------------------|---------|
|                        | Paths | Events | $\beta$                  | $p_{\beta}$  | Correlation      | $p_{\text{corr}}$ | Non-zero          | Entropy |
| <i>S. cerevisiae</i>   | 534   | 721    | $1.05 \pm 0.08$          | $< 10^{-16}$ | 0.68             | $< 10^{-16}$      | 265               | 0.91    |
| <i>E. coli</i>         | 492   | 602    | $0.98 \pm 0.14$          | $< 10^{-11}$ | 0.41             | $< 10^{-14}$      | 176               | 0.80    |
| <i>M. tuberculosis</i> | 283   | 4413   | $0.87 \pm 0.23$          | $< 10^{-3}$  | 0.16             | 0.003             | 111               | 0.53    |

**TABLE 1. Data and model fits.** Shown are the observed numbers of paths and events for adaptive changes in the three data sets, along with calculated values for the mutation coefficient  $\beta$  (with standard error) and its  $p$ -value, the Pearson's correlation between observed and predicted spectra of adaptive substitutions and its  $p$ -value, the number of non-zero elements in the spectrum of adaptive substitutions (out of 354), and the entropy of the spectrum of adaptive substitutions.

| Study      | Data  |        | Neg. binomial regression |             | Prediction model |                   | Spectrum elements |         |
|------------|-------|--------|--------------------------|-------------|------------------|-------------------|-------------------|---------|
|            | Paths | Events | $\beta$                  | $p_{\beta}$ | Correlation      | $p_{\text{corr}}$ | Non-zero elements | Entropy |
| Basel [5]  | 126   | 2319   | $0.86 \pm 0.27$          | 0.001       | 0.15             | 0.005             | 78                | 0.53    |
| Manson [4] | 168   | 2094   | $0.86 \pm 0.27$          | 0.002       | 0.17             | 0.002             | 80                | 0.52    |

**TABLE S1. Separately analyzing the adaptive events from the two meta-analyses of antibiotic resistance mutations in *M. tuberculosis* yields qualitatively similar results to analyzing them together.** Shown are the observed numbers of paths and events, the mutation coefficient  $\beta$  (with standard error) and its  $p$ -value, the Pearson's correlation between observed and predicted spectra of adaptive substitutions and its  $p$ -value, as well as the number of non-zero elements of the spectrum of adaptive substitutions and the entropy of the spectrum of adaptive substitutions.



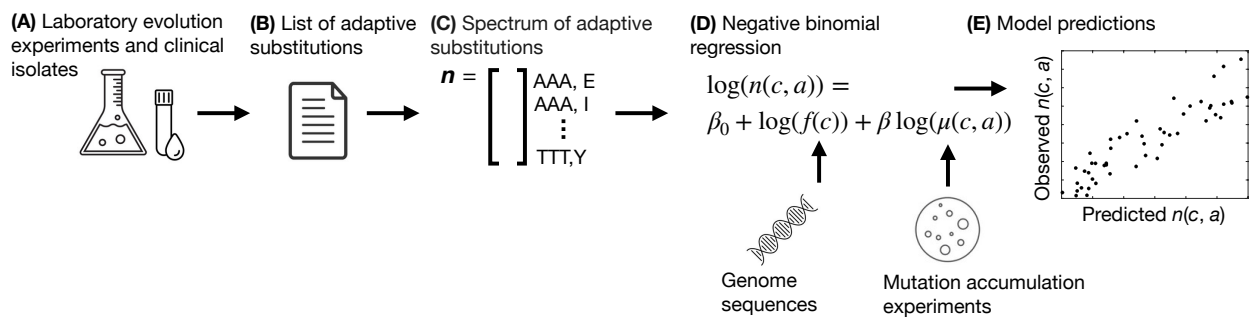

**Fig. 1. Workflow.** (a) We use data from laboratory evolution experiments (*E. coli* and *S. cerevisiae*) and clinical isolates (*M. tuberculosis*) to curate (b) a list of genetic changes associated with adaptation for each species. (c) From each list of adaptive mutations, we construct the spectrum of adaptive substitutions  $\mathbf{n}$ . Each element in this spectrum  $\mathbf{n}(c, a)$  corresponds to one of the 354 distinct changes from codon  $c$  to amino acid  $a$  that can be produced by a single nucleotide substitution under the standard genetic code and tallies the number of adaptive events per codon-to-amino acid change. (d) We perform negative binomial regression to model the influence of mutation bias on the spectrum of adaptive events, using codon frequencies derived from genome sequences and experimentally characterized mutation spectra. (e) We use the fitted model to predict the spectrum of adaptive events.

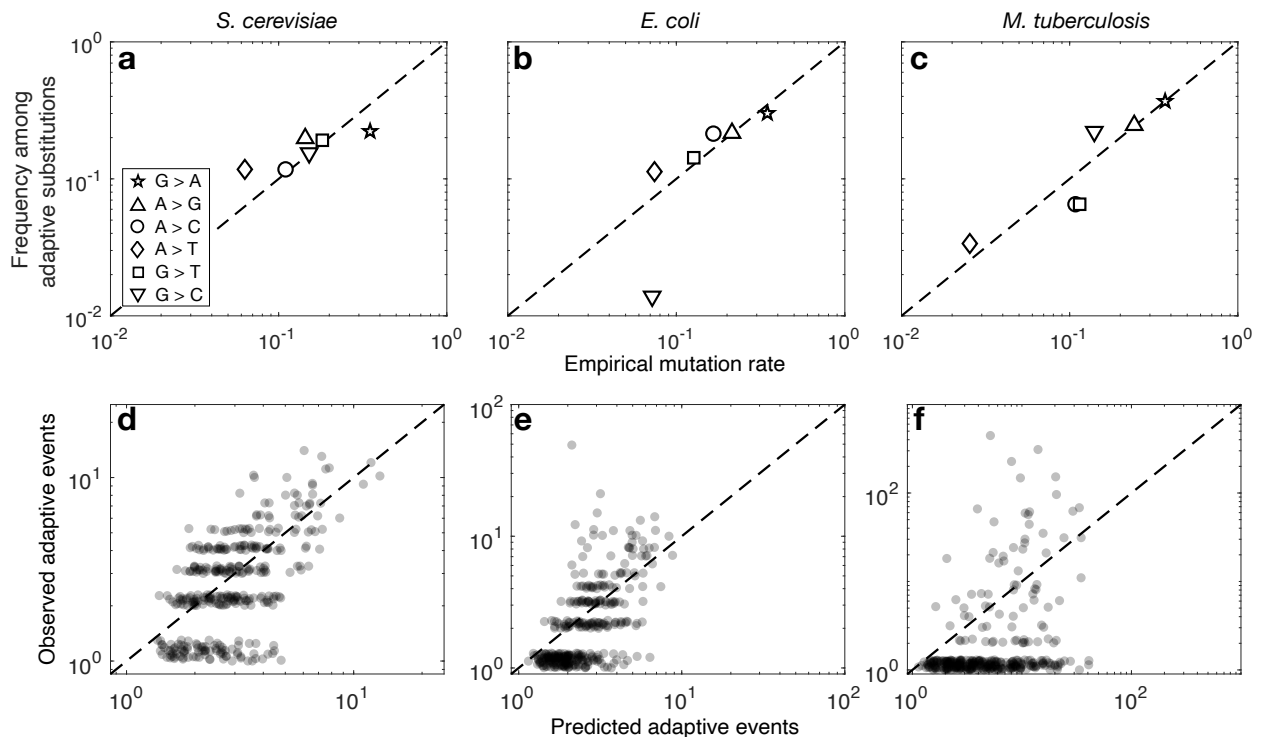

**Fig. 2. Predicted and observed substitutions at the nucleotide and codon-to-amino acid levels.** (a-c) The frequency of nucleotide changes among adaptive substitutions is plotted as a function of the empirical mutation rate for (a) *S. cerevisiae*, (b) *E. coli*, and (c) *M. tuberculosis*. The symbols correspond to the six different types of point mutations (inset in panel a). (d-f) The predicted spectra of adaptive substitutions are shown in relation to the observed spectra of adaptive substitutions for (d) *S. cerevisiae*, (e) *E. coli*, and (f) *M. tuberculosis*. For visualisation purposes, a pseudo count of 1 event and a jitter of range [0,0.3] were added to both the observed and predicted numbers of events in panels (d-f).

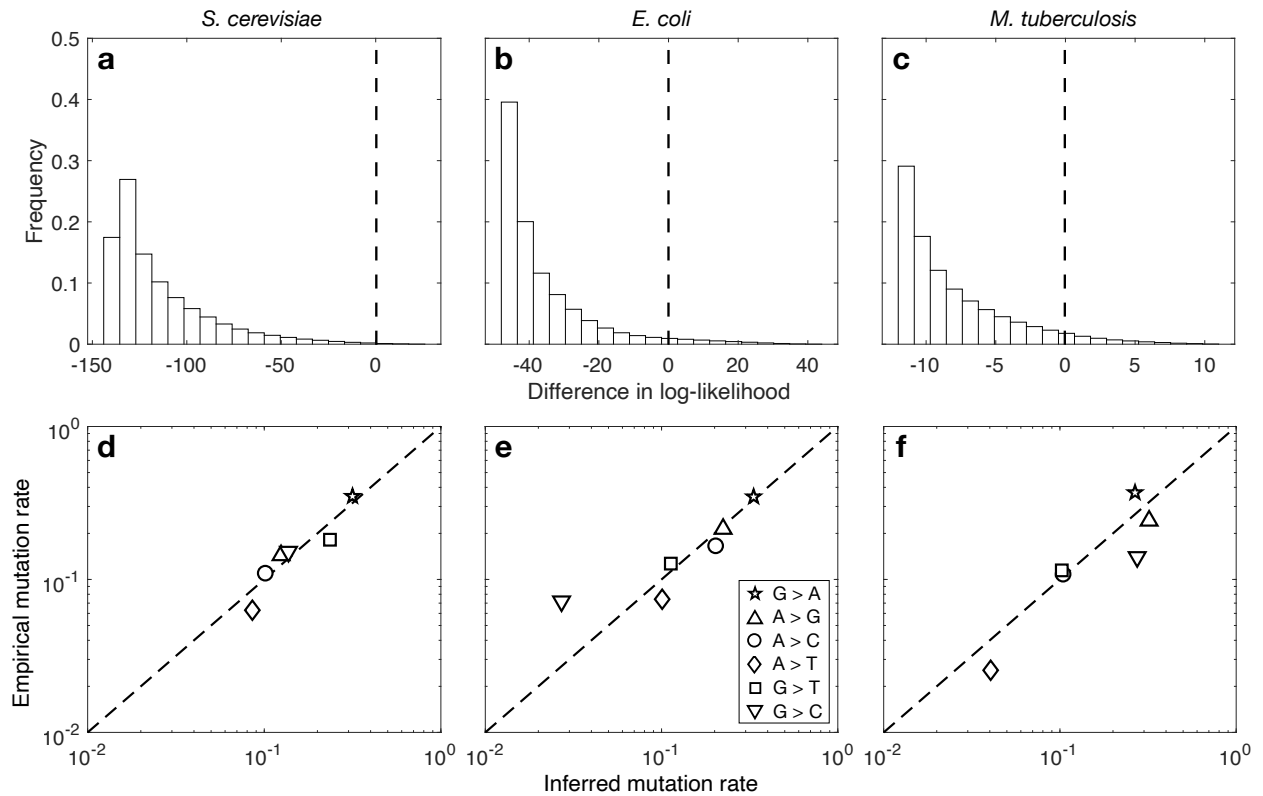

**Fig. 3. Empirical mutation rates explain the spectrum of adaptive substitutions better than randomized rates.** In the upper panels, the white bars show the distribution of log-likelihood differences for randomized vs. empirical mutation rates for (a) *S. cerevisiae*, (b) *E. coli*, and (c) *M. tuberculosis*. A value of 0 (dashed vertical line) means that a simulated rate performs as well as the empirical mutation rate. The fraction of randomized rates providing a better model fit than the empirical rates (i.e., right of 0) is 0.2 %, 3.7 %, 3.5 % for panels a, b and c, respectively. Data based on  $10^6$  randomized rates. Note that the three panels have different limits on their horizontal axes. In the lower panels, the empirical mutation rate is shown in relation to the inferred mutation rate on a double logarithmic scale for (d) *S. cerevisiae*, (e) *E. coli*, and (f) *M. tuberculosis*. Symbol types correspond to inset in (e). The dashed diagonal line indicates  $y = x$ .

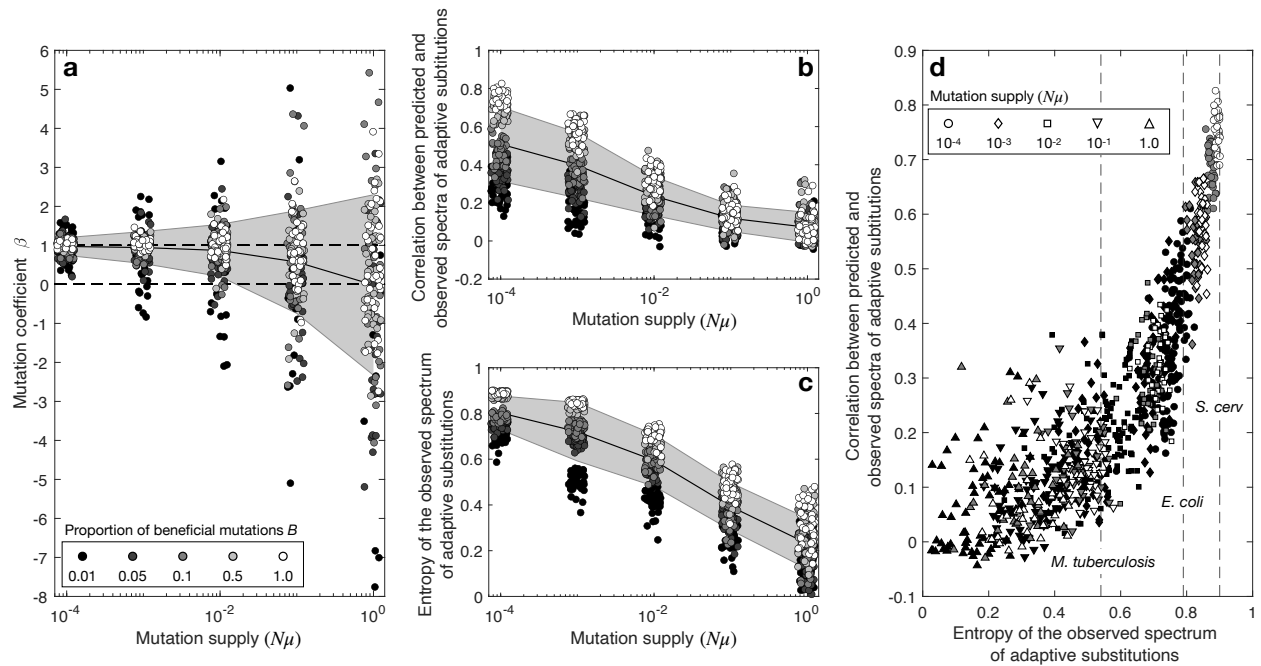

**Fig. 4. Evolutionary simulations show mutation supply and mutational target size jointly modulate the predictive power of our model.** (a) The inferred mutation coefficient  $\beta$  as a function of  $N\mu$  for five different values of  $B$ , the fraction of beneficial mutations (the same color scheme for  $B$  is used in all panels). Dashed horizontal lines are drawn at  $\beta = 0$  and  $\beta = 1$  to indicate no influence and proportional influence of the mutation spectrum on the spectrum of adaptive substitutions, respectively. (b) Pearson's correlation coefficient between predicted and simulated spectra of adaptive substitutions as a function of  $N\mu$  for five different values of  $B$ , and (c) entropy of simulated spectra of adaptive substitutions as a function of  $N\mu$  for five different values of  $B$ . In (a-c), the black lines show the mean and the gray areas show the standard deviation. (d) The Pearson's correlation coefficient between predicted and simulated spectra of adaptive substitutions is shown in relation to the entropy of the simulated spectra of adaptive substitutions for different levels of mutation supply. The dashed vertical lines show the entropy of the spectrum of adaptive substitutions for each of our three study species.

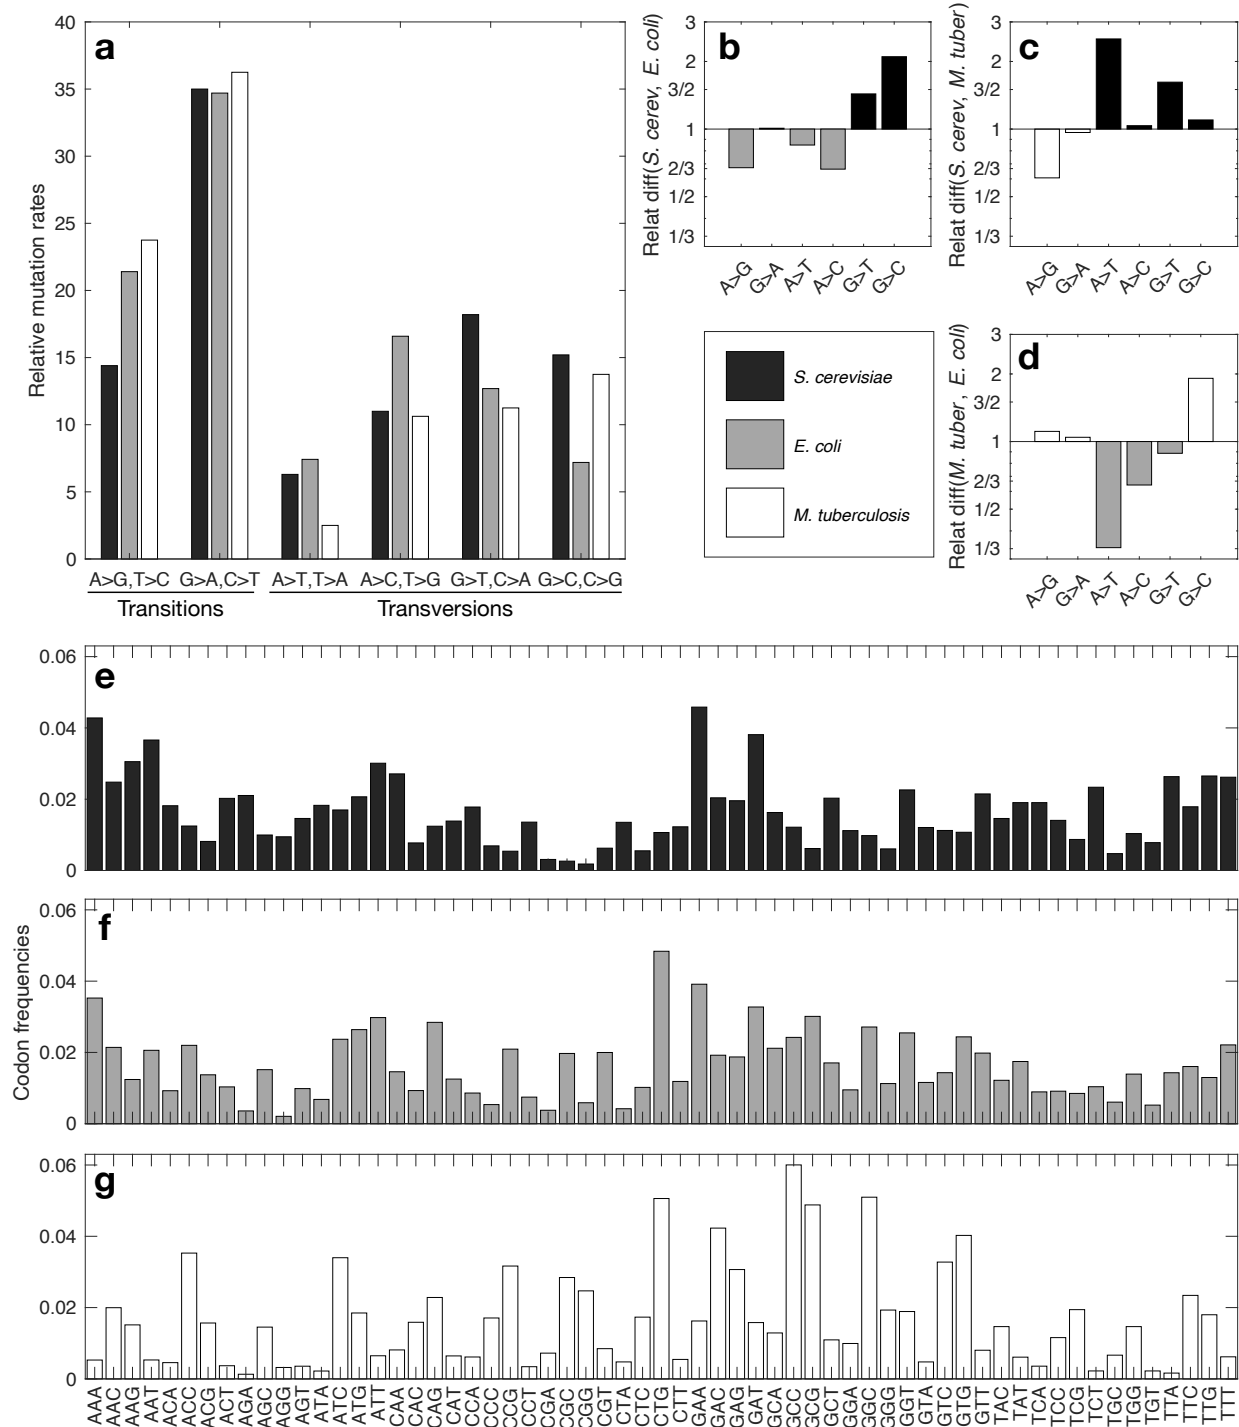

**Fig. S1. Empirical mutation spectra and codon frequencies.** (a) Bar plots of the empirical mutation spectra for *S. cerevisiae*, *E. coli*, and *M. tuberculosis*. Bar color indicates the species; see legend. (b-d) Relative difference in mutation rates per mutation type,  $\text{Relat diff}(b, a) = b/a$ . Bar color indicates the species with the highest mutation rate for each mutation type. The vertical axis is logarithmically scaled for visual clarity. (e-g) Bar plots of the empirical codon frequencies for (e) *S. cerevisiae*, (f) *E. coli*, and (g) *M. tuberculosis*.

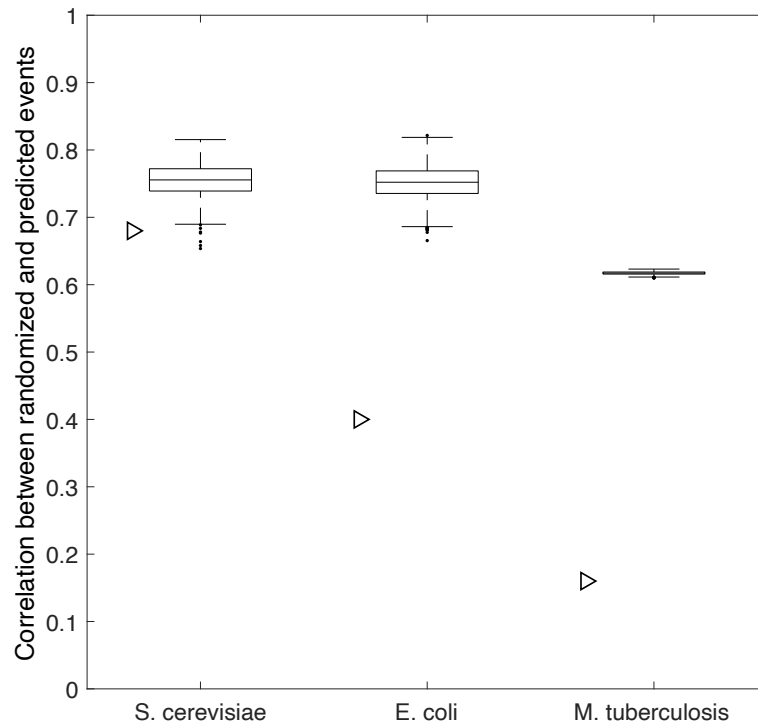

**Fig. S2. The correlation between predicted and randomized spectra of adaptive substitutions depends on mutational target size, even under origin-fixation dynamics.** The distribution of correlations between predicted and randomized spectra of adaptive substitutions using the codon frequencies, mutation spectra, and number of non-zero elements in the spectrum of adaptive substitutions are shown for *S. cerevisiae*, *E. coli*, and *M. tuberculosis*. Data pertain to  $10^3$  simulations. Triangles show the correlations reported in Table 1, for reference.

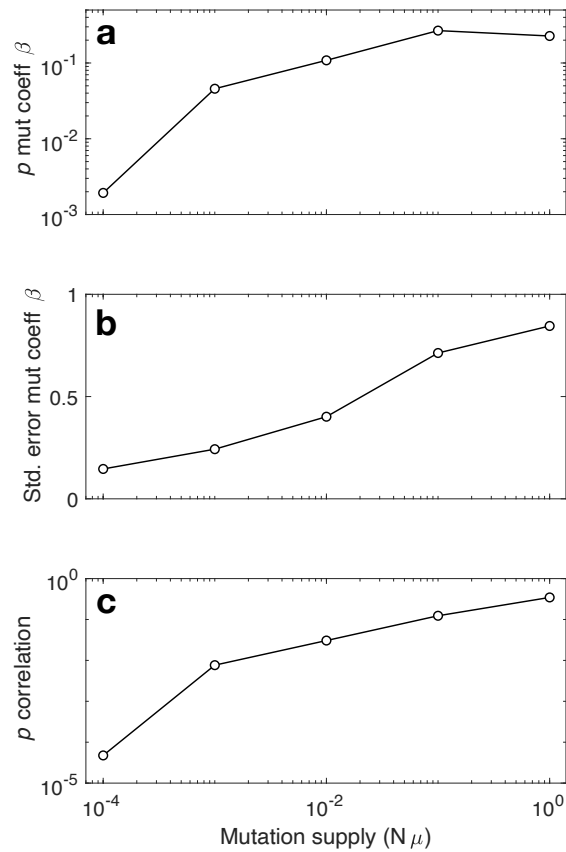

**Fig. S3. High mutation supply diminishes the influence of mutation bias on adaptive evolution.** The a) average  $p$ -value and b) standard error of the mutation coefficient  $\beta$ , and c) the average  $p$ -value of the correlation between predicted and simulated spectra of adaptive substitutions are shown in relation to mutation supply  $N\mu$ . Data pertain to those shown in Figs. 4a-c.



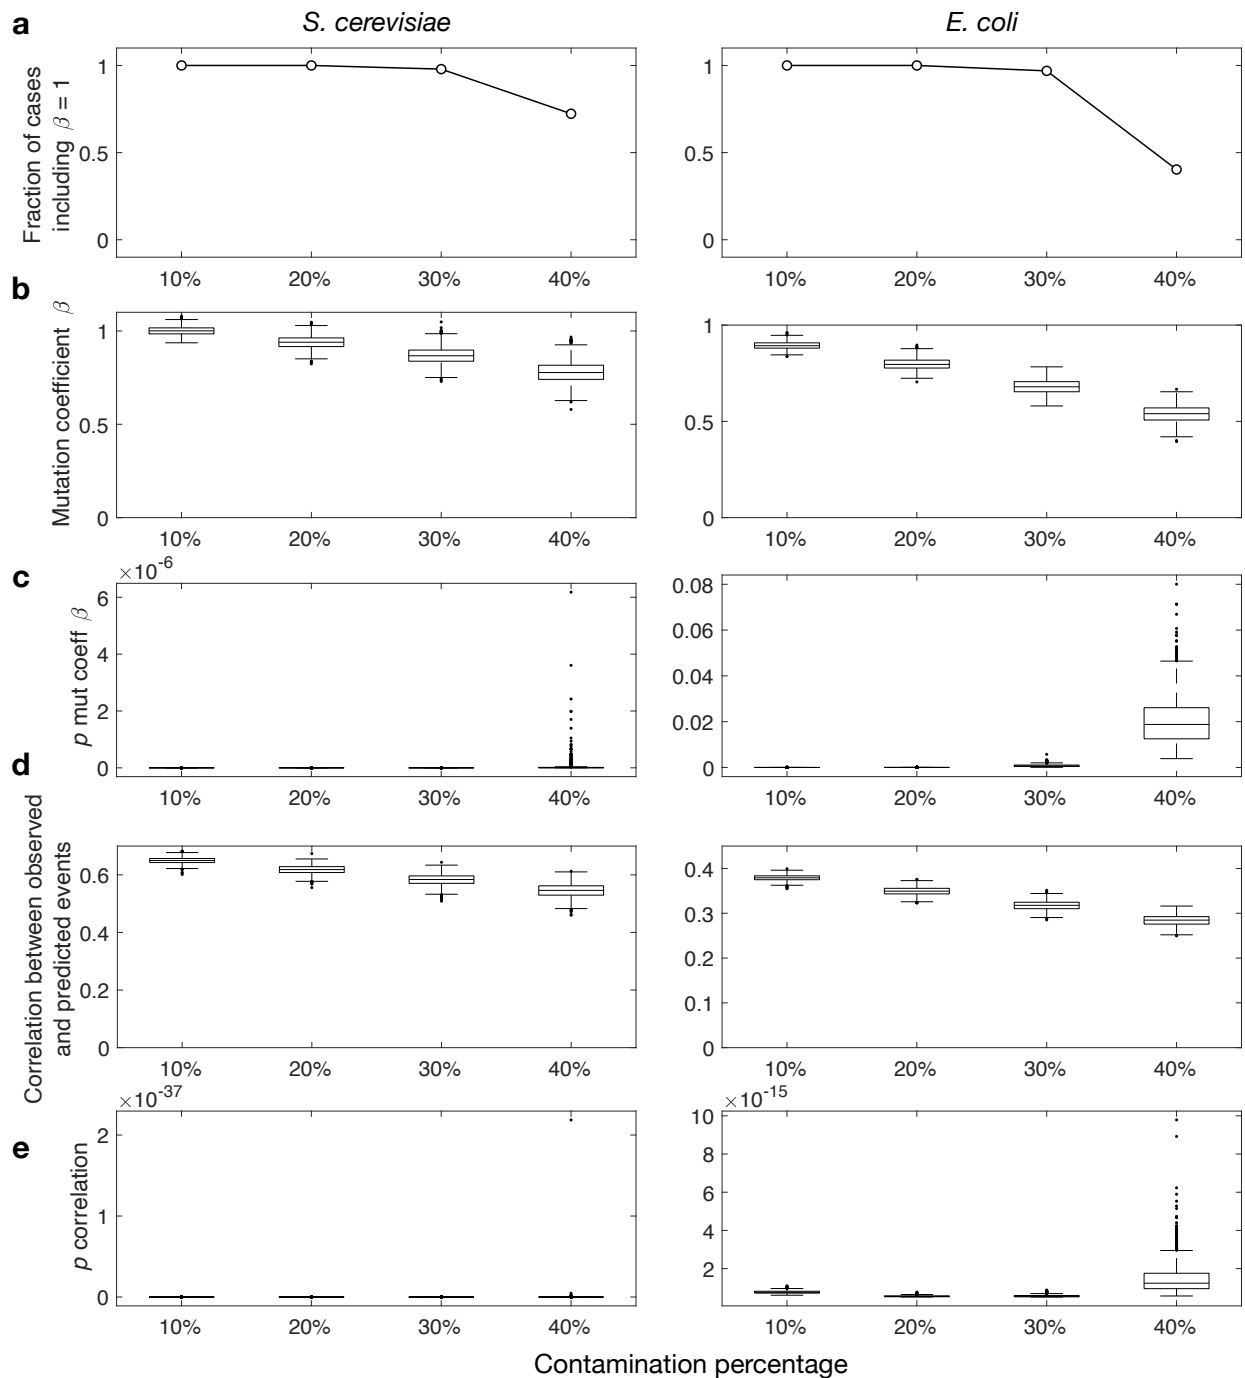

**Fig. S4. Contamination analysis supports the influence of mutation bias on adaptation.** (a) Fraction of simulated data sets in which the confidence interval includes  $\beta = 1$ . (b) Inferred mutation coefficients  $\beta$ , (c)  $p$ -values of the regression coefficients  $\beta$ , (d) Pearson's correlation coefficients between observed and predicted spectra of adaptive substitutions, and (e) the  $p$ -values of the correlation coefficients, are all shown in relation to the percentage of mutations randomly removed from the data sets of adaptive mutations.

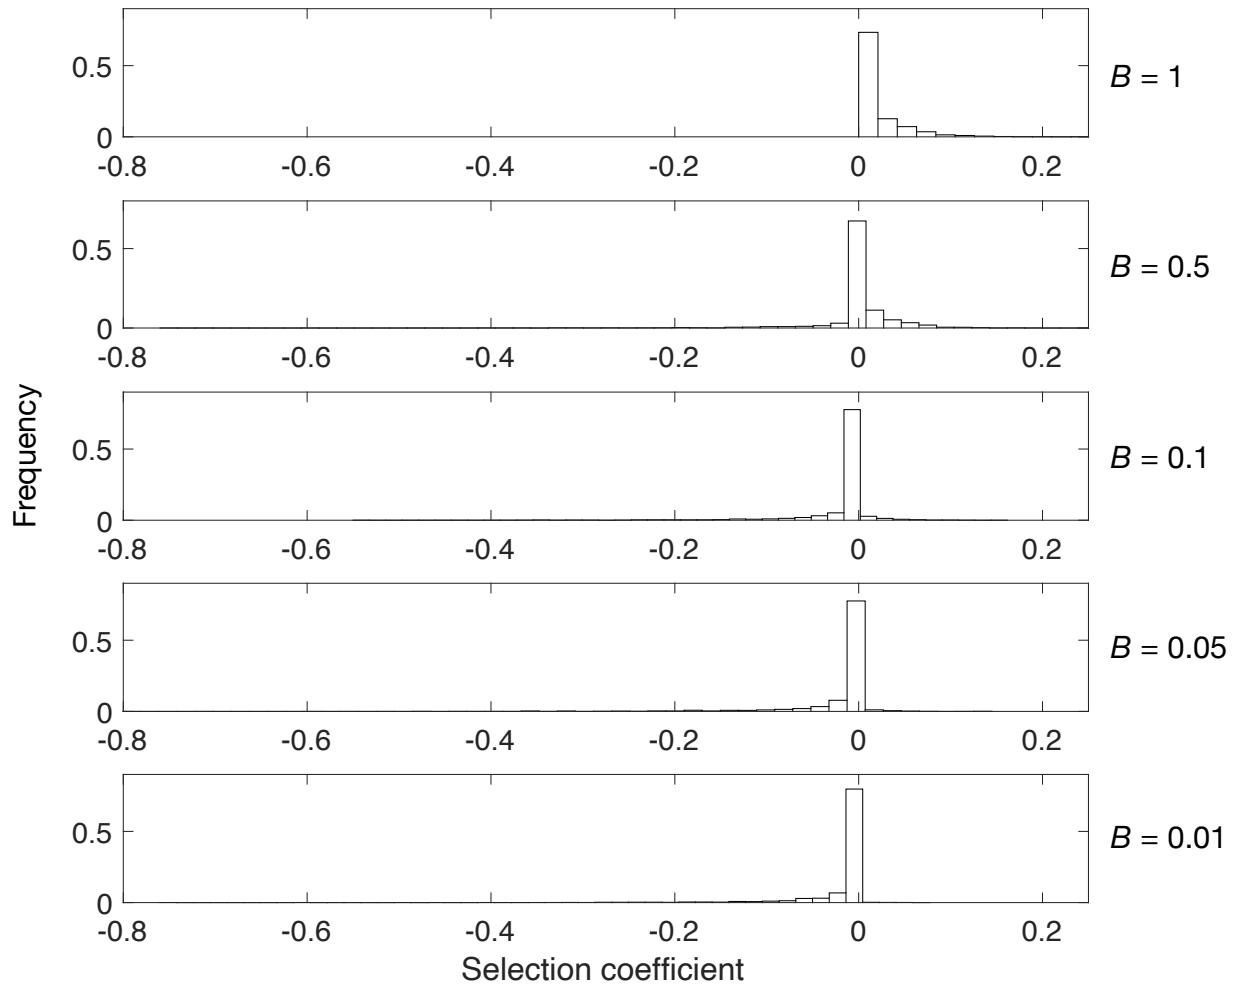

**Fig. S5. Distributions of fitness effects.** Representative distributions of fitness effects used in the evolutionary simulations for five different proportions of beneficial mutations  $B$ .
